# Supplementary material for: H-bond supported coordination polymers of transition metal sulfites with different dimensionalities
Source: Royal Society of Chemistry journal article supplement (doi:10.1039/c5ra16223h), 2015-01-01
Supplement: c5ra16223h1.pdf [file c5ra16223h1.pdf]

Supporting Information for:

**H–bond Supported Coordination Polymers of Transition Metal Sulfites  
with Different Dimensionalities**

**Ranjay K. Tiwari, Jitendra Kumar, and J. N. Behera\***

*School of Chemical Sciences, National Institute of Science Education and Research (NISER),  
Bhubaneswar 751005, India*

\*e-mail: [jnbehera@niser.ac.in](mailto:jnbehera@niser.ac.in)

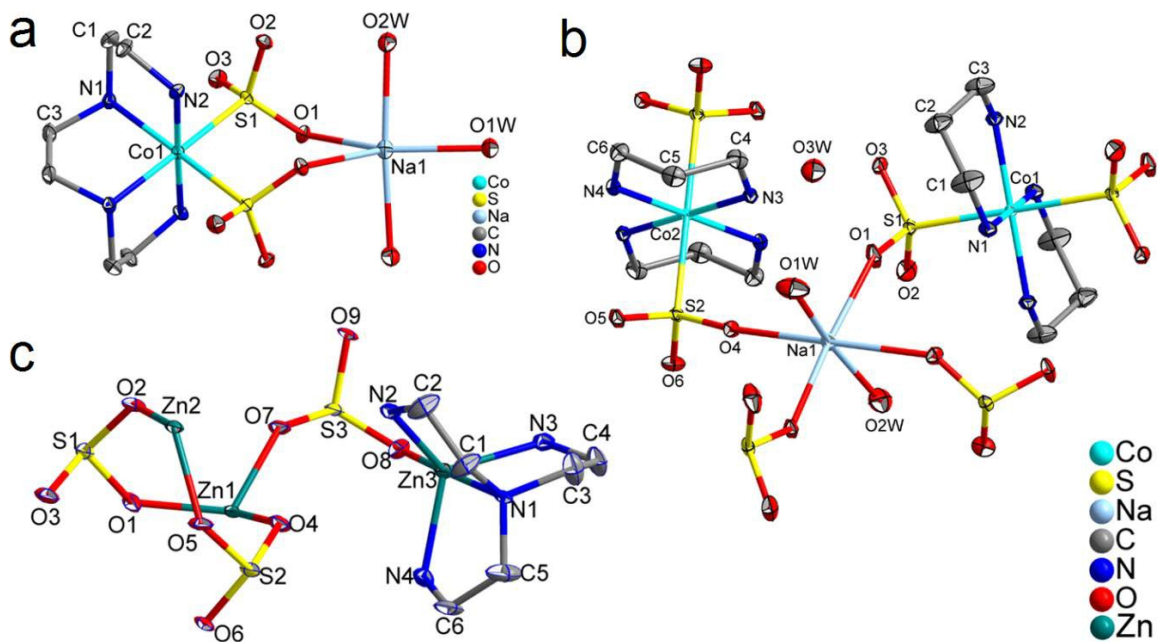

**Fig. S1** (a) Molecular structure of  $[(C_6N_4H_{18})NaCo(SO_3)_2(H_2O)_3]$ , **1**, at 35% ellipsoid probability; (b) Molecular structure of  $[(C_3N_2H_{10})_2NaCo(SO_3)_2(H_2O)_2].H_2O$ , **2**, at 30 % ellipsoid probability; (c) Asymmetric unit of  $[(C_6N_4H_{18})Zn_3(SO_3)_3]$ , **3**, with 20 % ellipsoid probability (unique atoms are labelled).

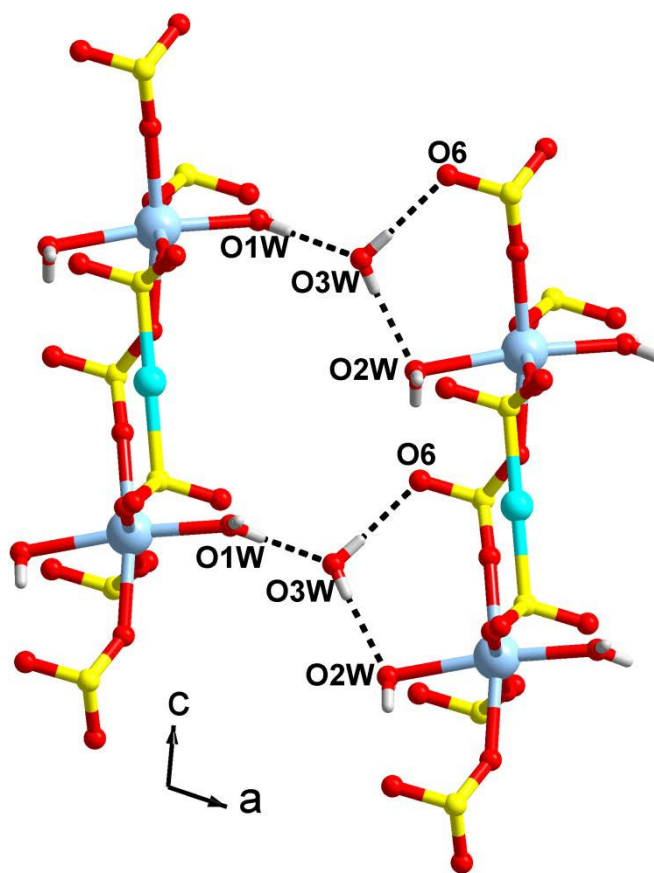

**Fig. S2.** Interconnection of different layers *via* H-bonding through water molecules in case of  $[(C_3N_2H_{10})_2NaCo(SO_3)_2(H_2O)_2].H_2O$ , **2**.

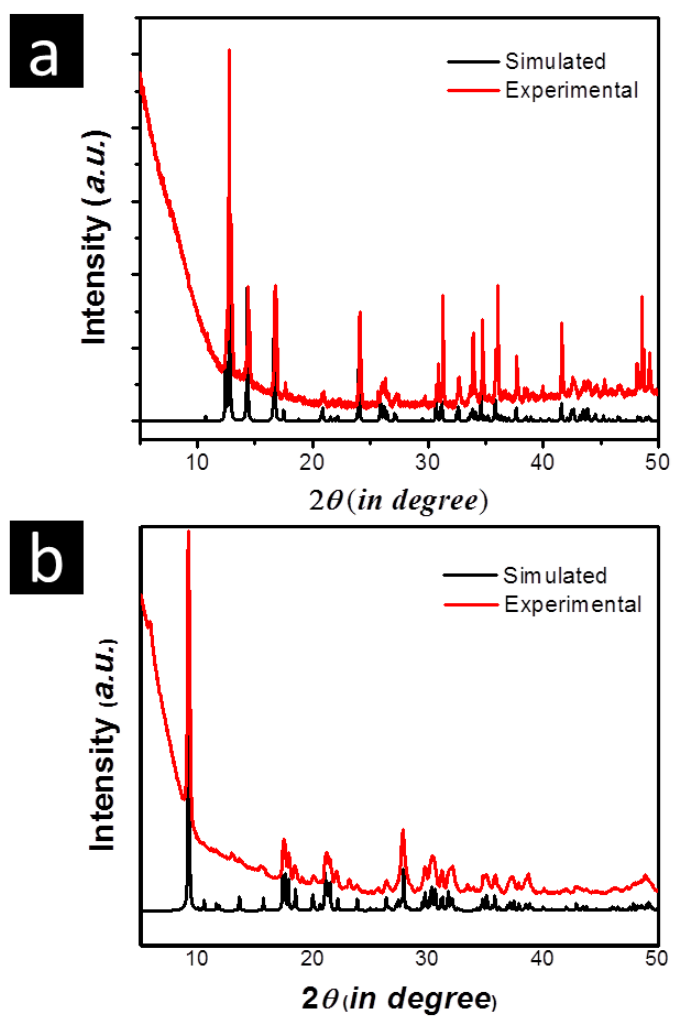

**Fig. S3.** PXRd pattern for (a)  $[(C_6N_4H_{18})NaCo(SO_3)_2(H_2O)_3]$ , (**1**) and (b)  $[(C_6N_4H_{18})Zn_3(SO_3)_3]$ , (**3**).

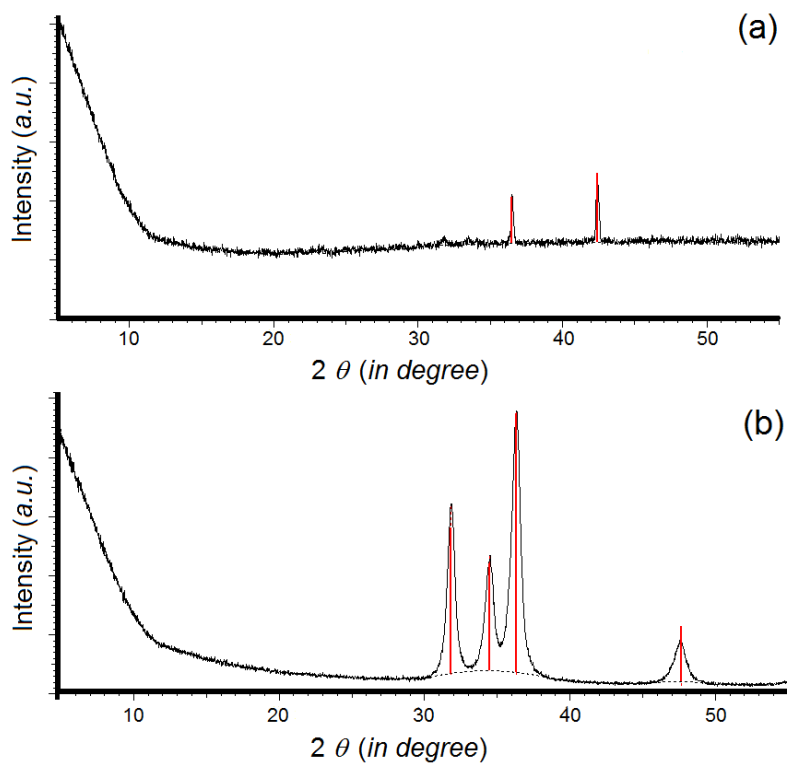

**Fig. S4.** Post calcination PXRD analysis of (a)  $[(C_6N_4H_{18})NaCo(SO_3)_2(H_2O)_3]$ , **1**, &  $[(C_3N_2H_{10})_2NaCo(SO_3)_2(H_2O)_2] \cdot H_2O$ , **2** and (b)  $[(C_6N_4H_{18})Zn_3(SO_3)_3]$ , **3** showing formation of CoO (PDF-00-043-1004) and ZnO (PDF-01-075-0576) respectively.

**Table S1.** Hydrogen bonding table for **1-3**.<sup>#</sup>

| D—H···A                                                                                                                                       | Symmetry of A        | D—H       | H···A     | D—A       | ∠D—H···A |
|-----------------------------------------------------------------------------------------------------------------------------------------------|----------------------|-----------|-----------|-----------|----------|
| <b>[(C<sub>6</sub>N<sub>4</sub>H<sub>18</sub>)NaCo(SO<sub>3</sub>)<sub>2</sub>(H<sub>2</sub>O)<sub>3</sub>], 1</b>                            |                      |           |           |           |          |
| N1—H1···O3                                                                                                                                    |                      | 0.88(4)   | 2.37(4)   | 2.898(3)  | 119(3)   |
| N1—H1···O2w                                                                                                                                   | -1/2+x, 1/2+y,z      | 0.88(4)   | 2.23(4)   | 2.964(4)  | 141(4)   |
| N2—H2A···O3                                                                                                                                   | 1/2+x, 1/2-y, 1/2+z  | 0.86(4)   | 2.26(4)   | 2.995(4)  | 144(4)   |
| N2—H2B···O2                                                                                                                                   |                      | 0.88(3)   | 2.13(4)   | 2.838(4)  | 138(4)   |
| O1w—H1w1···O3                                                                                                                                 | 1/2-x, -1/2+y, 1/2-z | 0.83(4)   | 2.00(4)   | 2.810(3)  | 166(4)   |
| O2w—H1w2···O1                                                                                                                                 | 1-x, -y, -z          | 0.82(2)   | 1.96(2)   | 2.762(3)  | 167(5)   |
| O2w—H2w2···O2                                                                                                                                 | 1-x, y, 1/2-z        | 0.86(3)   | 1.98(3)   | 2.770(3)  | 152(4)   |
| <b>[(C<sub>3</sub>N<sub>2</sub>H<sub>10</sub>)<sub>2</sub>NaCo(SO<sub>3</sub>)<sub>2</sub>(H<sub>2</sub>O)<sub>2</sub>].H<sub>2</sub>O, 2</b> |                      |           |           |           |          |
| N1—H1B···O1                                                                                                                                   | 1-x, -y, -z          | 0.83(3)   | 2.29(3)   | 2.855(2)  | 125(2)   |
| N1—H1B···O5                                                                                                                                   | 1-x, -y, -z          | 0.83(3)   | 2.22(3)   | 2.946(2)  | 146(3)   |
| N2—H2A···O3                                                                                                                                   | 1-x, -y, -z          | 0.85(3)   | 2.22(3)   | 2.866(2)  | 133(2)   |
| N2—H2A···O4                                                                                                                                   | x, 1/2-y, -1/2+z     | 0.85(3)   | 2.50(3)   | 3.085(2)  | 127(2)   |
| N3—H3A···O1                                                                                                                                   |                      | 0.84(2)   | 2.41(2)   | 2.934(2)  | 121(2)   |
| N3—H3A···O4                                                                                                                                   |                      | 0.84(2)   | 2.16(3)   | 2.870(2)  | 142(2)   |
| N3—H3B···O3                                                                                                                                   |                      | 0.84(3)   | 2.19(3)   | 3.005(2)  | 163(2)   |
| N4—H4B···O5                                                                                                                                   | x, 1/2-y, 1/2+z      | 0.86(3)   | 2.09(3)   | 2.821(2)  | 142(2)   |
| O1w—H1w1···O3w                                                                                                                                | 1+x, y, z            | 0.787(19) | 1.979(19) | 2.763(3)  | 175(2)   |
| O1w—H2w1···O2                                                                                                                                 | 1-x, 1/2+y, 1/2-z    | 0.85(2)   | 2.15(2)   | 2.931(3)  | 152(3)   |
| O2w—H1w2···O6                                                                                                                                 | x, 1/2-y, -1/2+z     | 0.84(2)   | 2.17(3)   | 2.986(3)  | 164(2)   |
| O2w—H2w2···O2                                                                                                                                 |                      | 0.84(2)   | 2.34(2)   | 3.136(3)  | 159(3)   |
| O3w—H1w3···O2w                                                                                                                                |                      | 0.78(3)   | 2.09(3)   | 2.846(3)  | 164(4)   |
| O3w—H2w3···O6                                                                                                                                 |                      | 0.81(2)   | 2.00(2)   | 2.814(2)  | 174(3)   |
| C3—H3B···O2                                                                                                                                   |                      | 0.97      | 2.55      | 3.188(3)  | 123      |
| C4—H4A···O6                                                                                                                                   | 1-x, -y, 1-z         | 0.97      | 2.53      | 3.182(2)  | 125      |
| <b>[(C<sub>6</sub>N<sub>4</sub>H<sub>18</sub>)Zn<sub>3</sub>(SO<sub>3</sub>)<sub>3</sub>], 3</b>                                              |                      |           |           |           |          |
| N2—H2A···O2                                                                                                                                   | -x, -y, -z           | 0.85(11)  | 2.54(11)  | 3.008(11) | 115(11)  |
| N2—H2A···O7                                                                                                                                   | -x, -y, -z           | 0.85(11)  | 2.33(14)  | 3.015(14) | 138(11)  |
| N2—H2B···O4                                                                                                                                   |                      | 0.85      | 2.27      | 3.031(10) | 150      |
| N2—H2B···O9                                                                                                                                   | -x, -y, -z           | 0.85      | 2.57      | 3.079(14) | 120      |
| N3—H3A···O6                                                                                                                                   | 1-x, -y, -z          | 0.86(8)   | 2.40(9)   | 3.057(14) | 134(8)   |
| N3—H3B···O5                                                                                                                                   | 1+x, y, -1+z         | 0.81(10)  | 2.50(11)  | 3.089(13) | 131(11)  |
| N3—H3B···O2                                                                                                                                   | -x, -y, -z           | 0.81(10)  | 2.57(14)  | 3.158(16) | 131(11)  |
| N4—H4A···O4                                                                                                                                   |                      | 0.88      | 2.38      | 3.125(14) | 143      |
| N4—H4B···O3                                                                                                                                   | -x, -y, 1-z          | 0.86(10)  | 2.35(10)  | 3.049(13) | 139(7)   |
| C4—H4D···O5                                                                                                                                   | 1+x, y, -1+z         | 0.97      | 2.48      | 3.188(15) | 130      |

<sup>#</sup> Where 'D' is donor and 'A' is acceptor, the bond lengths are in (Å) and angles are in (°).

**Table S2.** Complete list of bond lengths [ $\text{\AA}$ ] and bond angles [ $^\circ$ ] for **1-3<sup>#</sup>**

| <b>[(C<sub>6</sub>N<sub>4</sub>H<sub>18</sub>)NaCo(SO<sub>3</sub>)<sub>2</sub>(H<sub>2</sub>O)<sub>3</sub>], 1</b>                            |            |                                      |            |                        |            |
|-----------------------------------------------------------------------------------------------------------------------------------------------|------------|--------------------------------------|------------|------------------------|------------|
| Co1—N1                                                                                                                                        | 2.020(3)   | Na1—O2w                              | 2.339(3)   | C1—C2                  | 1.508(5)   |
| Co1—N2                                                                                                                                        | 1.971(3)   | S1—O1                                | 1.488(2)   | C2—N2                  | 1.485(4)   |
| Co1—S1                                                                                                                                        | 2.216(8)   | S1—O2                                | 1.485(2)   | C3—N1                  | 1.487(4)   |
| Na1—O1                                                                                                                                        | 2.349(3)   | S1—O3                                | 1.488(2)   | C3—C3 <sup>a</sup>     | 1.503(7)   |
| Na1—O1w                                                                                                                                       | 2.281(4)   | C1—N1                                | 1.497(4)   |                        |            |
| N1—Co1—N1 <sup>a</sup>                                                                                                                        | 84.97(16)  | O1—Na1—O1w                           | 140.01(6)  | O1—S1—O3               | 108.61(13) |
| N1—Co1—N2                                                                                                                                     | 85.14(11)  | O1—Na1—O2w                           | 95.46(9)   | O2—S1—O3               | 109.90(15) |
| N1—Co1—N2 <sup>a</sup>                                                                                                                        | 95.71(11)  | O1—Na1—O2w <sup>a</sup>              | 87.77(9)   | S1—O1—Na1              | 124.46(13) |
| N1—Co1—S1                                                                                                                                     | 90.58(8)   | O1w—Na1—O2w                          | 87.90(8)   | N1—C1—C2               | 109.5(3)   |
| N1—Co1—S1 <sup>a</sup>                                                                                                                        | 171.03(8)  | O1w—Na1—O2w <sup>a</sup>             | 87.90(8)   | N2—C2—C1               | 108.1(3)   |
| N2—Co1—N2 <sup>a</sup>                                                                                                                        | 178.86(15) | O2w—Na1—O2w <sup>a</sup>             | 175.80(15) | C1—N1—Co1              | 107.76(19) |
| N2—Co1—S1                                                                                                                                     | 91.66(9)   | O1—S1—Co1                            | 111.93(10) | C3—N1—Co1              | 110.4(2)   |
| N2—Co1—S1 <sup>a</sup>                                                                                                                        | 87.57(8)   | O2—S1—Co1                            | 109.95(10) | C3—N1—C1               | 113.1(3)   |
| S1—Co1—S1 <sup>a</sup>                                                                                                                        | 94.85(4)   | O3—S1—Co1                            | 106.86(10) | C2—N2—Co1              | 112.1(2)   |
| O1—Na1—O1 <sup>a</sup>                                                                                                                        | 79.99(12)  | O1—S1—O2                             | 109.54(13) | N1—C3—C3 <sup>a</sup>  | 110.8(2)   |
| <b>[(C<sub>3</sub>N<sub>2</sub>H<sub>10</sub>)<sub>2</sub>NaCo(SO<sub>3</sub>)<sub>2</sub>(H<sub>2</sub>O)<sub>2</sub>].H<sub>2</sub>O, 2</b> |            |                                      |            |                        |            |
| Co1—N1                                                                                                                                        | 1.988(2)   | Na1—O5 <sup>c</sup>                  | 2.401(1)   | C1—C2                  | 1.479(3)   |
| Co1—N2                                                                                                                                        | 1.978(2)   | Na1—O1w                              | 2.337(2)   | C2—C3                  | 1.475(3)   |
| Co1—S1                                                                                                                                        | 2.259(4)   | Na1—O2w                              | 2.563(2)   | C4—C5                  | 1.508(3)   |
| Co2—N3                                                                                                                                        | 1.971(1)   | S1—O1                                | 1.485(2)   | C5—C6                  | 1.510(3)   |
| Co2—N4                                                                                                                                        | 1.987(2)   | S1—O2                                | 1.479(2)   | C1—N1                  | 1.472(3)   |
| Co2—S2                                                                                                                                        | 2.273(4)   | S1—O3                                | 1.492(1)   | C3—N2                  | 1.476(3)   |
| Na1—O1                                                                                                                                        | 2.319(2)   | S2—O4                                | 1.488(1)   | C4—N3                  | 1.480(2)   |
| Na1—O3 <sup>b</sup>                                                                                                                           | 2.379(1)   | S2—O5                                | 1.491(1)   | C6—N4                  | 1.485(2)   |
| Na1—O4                                                                                                                                        | 2.389(1)   | S2—O6                                | 1.487(1)   |                        |            |
| N1—Co1—N1 <sup>d</sup>                                                                                                                        | 180.0      | O1—Na1—O5 <sup>c</sup>               | 82.71(5)   | O6—S2—O4               | 108.87(8)  |
| N1—Co1—N2                                                                                                                                     | 94.34(6)   | O1—Na1—O1w                           | 97.91(7)   | O4—S2—O5               | 109.17(8)  |
| N1—Co1—N2 <sup>d</sup>                                                                                                                        | 85.66(7)   | O1—Na1—O2w                           | 81.03(7)   | O6—S2—Co2              | 113.31(6)  |
| N1—Co1—S1                                                                                                                                     | 89.41(5)   | O3 <sup>b</sup> —Na1—O4              | 93.92(5)   | O4—S2—Co2              | 109.38(5)  |
| N1—Co1—S1 <sup>d</sup>                                                                                                                        | 90.59(5)   | O3 <sup>b</sup> —Na1—O5 <sup>c</sup> | 91.84(5)   | O5—S2—Co2              | 108.65(6)  |
| N2—Co1—N2 <sup>d</sup>                                                                                                                        | 180.0      | O3 <sup>b</sup> —Na1—O2w             | 100.74(7)  | N1—C1—C2               | 115.75(19) |
| N2—Co1—S1                                                                                                                                     | 89.52(5)   | O4—Na1—O5 <sup>c</sup>               | 170.32(6)  | C3—C2—C1               | 115.2(2)   |
| N2—Co1—S1 <sup>d</sup>                                                                                                                        | 90.48(5)   | O4—Na1—O2w                           | 92.27(6)   | C2—C3—N2               | 114.01(19) |
| N3—Co2—N3 <sup>e</sup>                                                                                                                        | 180.0      | O5 <sup>c</sup> —Na1—O2w             | 79.01(6)   | N3—C4—C5               | 111.98(15) |
| N3—Co2—N4                                                                                                                                     | 94.76(6)   | O1w—Na1—O3 <sup>b</sup>              | 79.68(6)   | C4—C5—C6               | 112.01(17) |
| N3—Co2—N4 <sup>e</sup>                                                                                                                        | 85.24(7)   | O1w—Na1—O4                           | 94.03(7)   | N4—C6—C5               | 112.14(17) |
| N3—Co2—S2                                                                                                                                     | 90.25(5)   | O1w—Na1—O5 <sup>c</sup>              | 94.64(7)   | C1—N1—Co1              | 125.30(13) |
| N3—Co2—S2 <sup>e</sup>                                                                                                                        | 89.75(5)   | O1w—Na1—O2w                          | 173.64(8)  | C3—N2—Co1              | 123.71(13) |
| N4—Co2—N4 <sup>e</sup>                                                                                                                        | 180.0      | O1—S1—O2                             | 108.35(10) | C4—N3—Co2              | 124.39(12) |
| N4—Co2—S2                                                                                                                                     | 90.04(5)   | O1—S1—O3                             | 108.86(9)  | C6—N4—Co2              | 123.73(12) |
| N4—Co2—S2 <sup>e</sup>                                                                                                                        | 89.96(5)   | O2—S1—O3                             | 108.80(9)  | S1—O1—Na1              | 152.26(12) |
| S1—Co1—S1 <sup>d</sup>                                                                                                                        | 180.0      | O2—S1—Co1                            | 111.61(7)  | S1—O3—Na1 <sup>f</sup> | 144.26(9)  |
| S2—Co2—S2 <sup>e</sup>                                                                                                                        | 180.0      | O1—S1—Co1                            | 109.47(6)  | S2—O4—Na1              | 170.70(9)  |
| O1—Na1—O3 <sup>b</sup>                                                                                                                        | 173.87(6)  | O3—S1—Co1                            | 109.69(5)  | S2—O5—Na1 <sup>g</sup> | 143.27(8)  |
| O1—Na1—O4                                                                                                                                     | 91.87(5)   |                                      |            |                        |            |
| <b>[(C<sub>6</sub>N<sub>4</sub>H<sub>18</sub>)Zn<sub>3</sub>(SO<sub>3</sub>)<sub>3</sub>], 3</b>                                              |            |                                      |            |                        |            |

|                                      |          |           |           |                        |           |
|--------------------------------------|----------|-----------|-----------|------------------------|-----------|
| Zn1—O1                               | 1.925(7) | Zn3—N3    | 2.058(10) | O9—S3                  | 1.504(7)  |
| Zn1—O4                               | 1.977(8) | Zn3—N4    | 2.075(9)  | C1—N1                  | 1.428(14) |
| Zn1—O6 <sup>h</sup>                  | 1.953(7) | O1—S1     | 1.508(7)  | C1—C2                  | 1.431(16) |
| Zn1—O7                               | 1.939(7) | O2—S1     | 1.538(7)  | C2—N2                  | 1.428(16) |
| Zn2—O2                               | 1.934(8) | O3—S1     | 1.513(8)  | C3—C4                  | 1.421(17) |
| Zn2—O3 <sup>i</sup>                  | 1.962(7) | O4—S2     | 1.528(7)  | C3—N1                  | 1.453(14) |
| Zn2—O5                               | 1.954(7) | O5—S2     | 1.501(7)  | C4—N3                  | 1.453(15) |
| Zn2—O9 <sup>j</sup>                  | 1.936(7) | O6—S2     | 1.526(7)  | C5—C6                  | 1.404(16) |
| Zn3—O8                               | 2.037(8) | O7—S3     | 1.506(8)  | C5—N1                  | 1.462(13) |
| Zn3—N1                               | 2.262(9) | O8—S3     | 1.505(7)  | C6—N4                  | 1.445(14) |
| Zn3—N2                               | 2.024(9) |           |           |                        |           |
|                                      |          |           |           |                        |           |
| O1—Zn1—O4                            | 117.5(3) | N2—Zn3—N3 | 119.7(3)  | C2—N2—Zn3              | 113.5(8)  |
| O1—Zn1—O6 <sup>h</sup>               | 110.5(3) | N2—Zn3—N4 | 115.3(3)  | C4—N3—Zn3              | 113.5(8)  |
| O1—Zn1—O7                            | 113.1(3) | N3—Zn3—N4 | 116.8(3)  | C6—N4—Zn3              | 112.2(7)  |
| O4—Zn1—O6 <sup>h</sup>               | 104.7(3) | O1—S1—O3  | 103.7(4)  | S2—O4—Zn1              | 122.9(4)  |
| O4—Zn1—O7                            | 98.6(3)  | O1—S1—O2  | 105.1(4)  | S2—O5—Zn2              | 129.3(4)  |
| O7—Zn1—O6 <sup>h</sup>               | 111.7(3) | O2—S1—O3  | 104.5(5)  | S2—O6—Zn1 <sup>h</sup> | 128.7(4)  |
| O2—Zn2—O3 <sup>i</sup>               | 105.7(4) | O4—S2—O5  | 105.1(4)  | S3—O7—Zn1              | 136.3(5)  |
| O2—Zn2—O5                            | 117.7(3) | O6—S2—O4  | 105.6(4)  | S3—O8—Zn3              | 133.2(5)  |
| O2—Zn2—O9 <sup>j</sup>               | 103.2(4) | O5—S2—O6  | 104.8(4)  | S3—O9—Zn2 <sup>j</sup> | 135.6(5)  |
| O3 <sup>i</sup> —Zn2—O5              | 108.3(3) | O8—S3—O9  | 106.4(5)  | S1—O1—Zn1              | 131.3(4)  |
| O3 <sup>i</sup> —Zn2—O9 <sup>j</sup> | 111.8(3) | O7—S3—O9  | 101.1(5)  | S1—O2—Zn2              | 126.8(5)  |
| O5—Zn2—O9 <sup>j</sup>               | 110.0(3) | O7—S3—O8  | 106.2(5)  | S1—O3—Zn2 <sup>i</sup> | 129.4(4)  |
| N1—Zn3—O8                            | 174.7(3) | C1—N1—C3  | 113.7(10) | N1—C1—C2               | 114.6(11) |
| N2—Zn3—O8                            | 104.4(4) | C1—N1—C5  | 112.3(10) | N2—C2—C1               | 115.8(11) |
| N3—Zn3—O8                            | 94.8(3)  | C3—N1—C5  | 111.6(11) | C4—C3—N1               | 116.7(11) |
| N4—Zn3—O8                            | 99.6(3)  | C1—N1—Zn3 | 106.9(7)  | C3—C4—N3               | 114.7(11) |
| N1—Zn3—N2                            | 80.1(3)  | C3—N1—Zn3 | 106.0(7)  | C6—C5—N1               | 116.3(11) |
| N1—Zn3—N3                            | 80.5(4)  | C5—N1—Zn3 | 105.7(7)  | C5—C6—N4               | 116.6(10) |
| N1—Zn3—N4                            | 80.7(3)  |           |           |                        |           |

<sup>#</sup>Symmetry transformations used to generate equivalent atoms: (a)  $-x, y, -z+3/2$ ; (b)  $-x+1, y-1/2, -z-1/2$ ; (c)  $x, -y+1/2, z-1/2$ ; (d)  $-x+1, -y+1, -z-1$ ; (e)  $-x+1, -y+1, -z$ ; (f)  $-x+1, y+1/2, -z-1/2$ ; (g)  $x, -y+1/2, z+1/2$ ; (h)  $-x, -y, -z+1$ ; (i)  $-x-1, -y, -z+1$ ; (j)  $-x, -y, -z$

**Table S3.** Atomic coordinates ( $\times 10^4$ ) and equivalent isotropic displacement parameters ( $\text{\AA}^2 \times 10^3$ ) for **1-3**  $U(\text{eq})$  is defined as one third of the trace of the orthogonalized  $U_{ij}$  tensor.

|                                                                                                                                               | x        | y        | z        | $U(\text{eq})$ |
|-----------------------------------------------------------------------------------------------------------------------------------------------|----------|----------|----------|----------------|
| <b>[(C<sub>6</sub>N<sub>4</sub>H<sub>18</sub>)NaCo(SO<sub>3</sub>)<sub>2</sub>(H<sub>2</sub>O)<sub>3</sub>], 1</b>                            |          |          |          |                |
| Co1                                                                                                                                           | 0        | 2274(1)  | 7500     | 14(1)          |
| S1                                                                                                                                            | 1609(1)  | 3330(1)  | 7664(1)  | 17(1)          |
| Na1                                                                                                                                           | 0        | 5444(1)  | 7500     | 29(1)          |
| C1                                                                                                                                            | 1725(4)  | 1256(2)  | 6117(3)  | 27(1)          |
| C2                                                                                                                                            | 548(4)   | 1491(2)  | 5156(3)  | 28(1)          |
| C3                                                                                                                                            | 735(4)   | 306(2)   | 7691(4)  | 31(1)          |
| N1                                                                                                                                            | 1313(3)  | 1226(2)  | 7400(2)  | 20(1)          |
| N2                                                                                                                                            | -164(3)  | 2288(2)  | 5649(2)  | 20(1)          |
| O1                                                                                                                                            | 1290(2)  | 4177(2)  | 8377(2)  | 23(1)          |
| O2                                                                                                                                            | 1871(2)  | 3614(2)  | 6392(2)  | 25(1)          |
| O3                                                                                                                                            | 2799(2)  | 2871(2)  | 8363(2)  | 26(1)          |
| O1w                                                                                                                                           | 0        | 7049(3)  | 7500     | 44(1)          |
| O2w                                                                                                                                           | -1353(3) | 5504(2)  | 9079(2)  | 32(1)          |
| <b>[(C<sub>3</sub>N<sub>2</sub>H<sub>10</sub>)<sub>2</sub>NaCo(SO<sub>3</sub>)<sub>2</sub>(H<sub>2</sub>O)<sub>2</sub>].H<sub>2</sub>O, 2</b> |          |          |          |                |
| Co1                                                                                                                                           | 5000     | 5000     | -5000    | 15(1)          |
| Co2                                                                                                                                           | 5000     | 5000     | 0        | 14(1)          |
| Na1                                                                                                                                           | 4834(1)  | 2431(1)  | -2503(1) | 25(1)          |
| S1                                                                                                                                            | 4543(1)  | 4937(1)  | -3474(1) | 22(1)          |
| S2                                                                                                                                            | 4082(1)  | 3455(1)  | -78(1)   | 17(1)          |
| C1                                                                                                                                            | 1908(3)  | 6121(2)  | -5702(2) | 50(1)          |
| C2                                                                                                                                            | 1308(3)  | 5246(2)  | -6281(2) | 45(1)          |
| C3                                                                                                                                            | 1623(3)  | 4321(2)  | -5741(2) | 45(1)          |
| C4                                                                                                                                            | 7959(2)  | 4474(2)  | -680(2)  | 29(1)          |
| C5                                                                                                                                            | 8422(2)  | 3880(2)  | 250(2)   | 32(1)          |
| C6                                                                                                                                            | 8309(2)  | 4454(2)  | 1151(2)  | 31(1)          |
| N1                                                                                                                                            | 3610(2)  | 6151(1)  | -5296(1) | 23(1)          |
| N2                                                                                                                                            | 3294(2)  | 4055(1)  | -5461(1) | 22(1)          |
| N3                                                                                                                                            | 6261(2)  | 4675(1)  | -951(1)  | 20(1)          |
| N4                                                                                                                                            | 6663(2)  | 4657(1)  | 1181(1)  | 22(1)          |
| O1                                                                                                                                            | 5155(2)  | 4010(1)  | -2993(1) | 42(1)          |
| O2                                                                                                                                            | 2852(2)  | 4993(1)  | -3508(1) | 45(1)          |
| O3                                                                                                                                            | 5354(2)  | 5758(1)  | -2869(1) | 25(1)          |
| O4                                                                                                                                            | 4399(2)  | 2965(1)  | -961(1)  | 30(1)          |
| O5                                                                                                                                            | 4913(2)  | 2926(1)  | 825(1)   | 26(1)          |
| O6                                                                                                                                            | 2379(2)  | 3397(1)  | -122(1)  | 31(1)          |
| O1w                                                                                                                                           | 7469(2)  | 2068(2)  | -1853(2) | 56(1)          |
| O2w                                                                                                                                           | 2003(2)  | 2793(2)  | -3405(2) | 48(1)          |
| O3w                                                                                                                                           | 10289(2) | 2917(2)  | -1914(2) | 49(1)          |
| <b>[(C<sub>6</sub>N<sub>4</sub>H<sub>18</sub>)Zn<sub>3</sub>(SO<sub>3</sub>)<sub>3</sub>], 3</b>                                              |          |          |          |                |
| Zn1                                                                                                                                           | -17(1)   | -905(1)  | 3618(1)  | 35(1)          |
| Zn2                                                                                                                                           | -3378(1) | 996(1)   | 3050(1)  | 35(1)          |
| Zn3                                                                                                                                           | 3257(1)  | 1563(1)  | -536(1)  | 36(1)          |
| S1                                                                                                                                            | -3313(3) | -2027(3) | 5104(3)  | 37(1)          |
| S2                                                                                                                                            | -1229(3) | 2021(3)  | 3932(3)  | 36(1)          |
| S3                                                                                                                                            | 2423(3)  | -1722(3) | 557(3)   | 34(1)          |



|    |          |           |           |       |
|----|----------|-----------|-----------|-------|
| C1 | 1797(14) | 4350(14)  | -1233(18) | 65(4) |
| C2 | 1056(16) | 3346(15)  | -1368(18) | 72(4) |
| C3 | 4502(15) | 4347(14)  | -2848(15) | 71(4) |
| C4 | 5721(14) | 3387(14)  | -3235(14) | 61(4) |
| C5 | 3480(20) | 4331(14)  | -181(15)  | 76(5) |
| C6 | 3023(17) | 3363(13)  | 1299(13)  | 60(4) |
| N1 | 3242(9)  | 3921(9)   | -1294(9)  | 32(2) |
| N2 | 1273(10) | 1920(10)  | -651(9)   | 38(2) |
| N3 | 5274(10) | 1930(11)  | -2552(12) | 40(2) |
| N4 | 3222(10) | 1906(10)  | 1364(9)   | 42(2) |
| O1 | -1846(8) | -1943(9)  | 5138(8)   | 45(2) |
| O2 | -3118(9) | -1006(8)  | 3535(8)   | 46(2) |
| O3 | -4449(8) | -1324(10) | 6299(8)   | 53(2) |
| O4 | -195(8)  | 1142(8)   | 2864(8)   | 40(2) |
| O5 | -2753(8) | 1977(8)   | 4017(8)   | 42(2) |
| O6 | -1427(8) | 1185(8)   | 5552(7)   | 42(2) |
| O7 | 882(8)   | -1304(10) | 1641(8)   | 54(2) |
| O8 | 3481(9)  | -552(8)   | 33(9)     | 47(2) |
| O9 | 2189(9)  | -1631(10) | -812(8)   | 59(3) |

**Table S4.** Anisotropic displacement parameters ( $\text{\AA}^2 \times 10^3$ ) for **1-3**. The anisotropic displacement factor exponent takes the form:  $-2 \pi^2 [h^2 a^{*2} U_{11} + \dots + 2 h k a^* b^* U_{12}]$

|                                                                                                                                               | U11     | U22    | U33     | U23    | U13     | U12    |
|-----------------------------------------------------------------------------------------------------------------------------------------------|---------|--------|---------|--------|---------|--------|
| <b>[(C<sub>6</sub>N<sub>4</sub>H<sub>18</sub>)NaCo(SO<sub>3</sub>)<sub>2</sub>(H<sub>2</sub>O)<sub>3</sub>], 1</b>                            |         |        |         |        |         |        |
| Co1                                                                                                                                           | 14(1)   | 13(1)  | 15(1)   | 0      | 1(1)    | 0      |
| S1                                                                                                                                            | 15(1)   | 17(1)  | 18(1)   | -1(1)  | 2(1)    | -2(1)  |
| Na1                                                                                                                                           | 32(1)   | 22(1)  | 35(1)   | 0      | 7(1)    | 0      |
| C1                                                                                                                                            | 25(2)   | 27(2)  | 28(2)   | -3(1)  | 6(2)    | 7(1)   |
| C2                                                                                                                                            | 36(2)   | 27(2)  | 22(2)   | -6(1)  | 7(2)    | 8(2)   |
| C3                                                                                                                                            | 27(2)   | 16(1)  | 51(2)   | 3(2)   | 7(2)    | 3(1)   |
| N1                                                                                                                                            | 19(1)   | 17(1)  | 23(1)   | 0(1)   | 1(1)    | 2(1)   |
| N2                                                                                                                                            | 17(1)   | 22(1)  | 19(1)   | -2(1)  | 0(1)    | 3(1)   |
| O1                                                                                                                                            | 27(1)   | 18(1)  | 24(1)   | -5(1)  | 3(1)    | 0(1)   |
| O2                                                                                                                                            | 30(1)   | 25(1)  | 22(1)   | 1(1)   | 9(1)    | -6(1)  |
| O3                                                                                                                                            | 16(1)   | 28(1)  | 33(1)   | -1(1)  | -2(1)   | 2(1)   |
| O1w                                                                                                                                           | 38(3)   | 24(2)  | 77(3)   | 0      | 27(2)   | 0      |
| O2w                                                                                                                                           | 42(2)   | 28(1)  | 24(1)   | 1(1)   | 4(1)    | -2(1)  |
| <b>[(C<sub>3</sub>N<sub>2</sub>H<sub>10</sub>)<sub>2</sub>NaCo(SO<sub>3</sub>)<sub>2</sub>(H<sub>2</sub>O)<sub>2</sub>].H<sub>2</sub>O, 2</b> |         |        |         |        |         |        |
| Co1                                                                                                                                           | 21(1)   | 11(1)  | 14(1)   | 0(1)   | 5(1)    | -1(1)  |
| Co2                                                                                                                                           | 17(1)   | 12(1)  | 12(1)   | 0(1)   | 4(1)    | -1(1)  |
| Na1                                                                                                                                           | 37(1)   | 17(1)  | 22(1)   | 0(1)   | 10(1)   | 1(1)   |
| S1                                                                                                                                            | 35(1)   | 18(1)  | 14(1)   | -2(1)  | 10(1)   | -6(1)  |
| S2                                                                                                                                            | 24(1)   | 12(1)  | 18(1)   | -1(1)  | 8(1)    | -3(1)  |
| C1                                                                                                                                            | 32(1)   | 30(1)  | 77(2)   | -7(1)  | -8(1)   | 7(1)   |
| C2                                                                                                                                            | 32(1)   | 37(1)  | 56(2)   | -1(1)  | -10(1)  | 0(1)   |
| N4                                                                                                                                            | 24(1)   | 22(1)  | 18(1)   | 3(1)   | 3(1)    | -2(1)  |
| O1                                                                                                                                            | 92(1)   | 16(1)  | 22(1)   | 3(1)   | 19(1)   | -3(1)  |
| O2                                                                                                                                            | 33(1)   | 71(1)  | 35(1)   | -14(1) | 19(1)   | -14(1) |
| O3                                                                                                                                            | 40(1)   | 17(1)  | 18(1)   | -4(1)  | 8(1)    | -2(1)  |
| O4                                                                                                                                            | 50(1)   | 21(1)  | 23(1)   | -9(1)  | 19(1)   | -11(1) |
| C3                                                                                                                                            | 29(1)   | 34(1)  | 65(2)   | -5(1)  | 0(1)    | -6(1)  |
| C4                                                                                                                                            | 26(1)   | 30(1)  | 35(1)   | -3(1)  | 16(1)   | 1(1)   |
| C5                                                                                                                                            | 26(1)   | 28(1)  | 43(1)   | 3(1)   | 9(1)    | 6(1)   |
| C6                                                                                                                                            | 21(1)   | 37(1)  | 31(1)   | 6(1)   | 0(1)    | 0(1)   |
| N1                                                                                                                                            | 27(1)   | 16(1)  | 25(1)   | 1(1)   | 6(1)    | 1(1)   |
| N2                                                                                                                                            | 26(1)   | 17(1)  | 24(1)   | -3(1)  | 8(1)    | -4(1)  |
| N3                                                                                                                                            | 25(1)   | 19(1)  | 18(1)   | -2(1)  | 9(1)    | -3(1)  |
| O5                                                                                                                                            | 39(1)   | 18(1)  | 22(1)   | 6(1)   | 9(1)    | 1(1)   |
| O6                                                                                                                                            | 24(1)   | 26(1)  | 43(1)   | -2(1)  | 10(1)   | -6(1)  |
| O1w                                                                                                                                           | 32(1)   | 49(1)  | 87(2)   | 6(1)   | 13(1)   | -3(1)  |
| O2w                                                                                                                                           | 47(1)   | 56(1)  | 48(1)   | -7(1)  | 24(1)   | -5(1)  |
| O3w                                                                                                                                           | 33(1)   | 71(1)  | 44(1)   | 0(1)   | 9(1)    | -8(1)  |
| <b>[(C<sub>6</sub>N<sub>4</sub>H<sub>18</sub>)Zn<sub>3</sub>(SO<sub>3</sub>)<sub>3</sub>], 3</b>                                              |         |        |         |        |         |        |
| C1                                                                                                                                            | 46(8)   | 75(10) | 102(11) | -34(8) | -51(8)  | 6(7)   |
| C2                                                                                                                                            | 56(9)   | 79(11) | 115(13) | -37(9) | -62(10) | 10(8)  |
| C3                                                                                                                                            | 59(9)   | 60(9)  | 55(9)   | -14(7) | 2(7)    | -4(7)  |
| C4                                                                                                                                            | 38(8)   | 73(10) | 45(8)   | -25(7) | 5(6)    | 4(7)   |
| C5                                                                                                                                            | 134(15) | 64(9)  | 69(10)  | -21(8) | -78(11) | 6(9)   |
| C6                                                                                                                                            | 98(12)  | 62(9)  | 45(8)   | -26(6) | -43(8)  | -2(8)  |

|     |       |        |       |        |        |        |
|-----|-------|--------|-------|--------|--------|--------|
| N1  | 26(5) | 54(6)  | 20(4) | -19(4) | -12(4) | 6(4)   |
| N2  | 35(5) | 57(6)  | 28(5) | -23(4) | -12(4) | 0(4)   |
| N3  | 31(5) | 60(6)  | 42(5) | -25(5) | -22(5) | 7(5)   |
| N4  | 36(6) | 62(6)  | 28(5) | -13(4) | -17(4) | 2(5)   |
| O1  | 24(4) | 83(6)  | 24(4) | -9(4)  | -11(3) | -3(4)  |
| O2  | 55(5) | 67(5)  | 26(4) | -13(4) | -24(4) | -6(4)  |
| O3  | 29(4) | 113(7) | 32(4) | -37(4) | -17(4) | 8(4)   |
| O4  | 39(4) | 59(5)  | 24(4) | -23(3) | -10(3) | 4(4)   |
| O5  | 30(4) | 78(6)  | 38(4) | -37(4) | -24(4) | 13(4)  |
| O6  | 28(4) | 83(6)  | 17(4) | -20(4) | -9(3)  | 2(4)   |
| O7  | 30(4) | 110(7) | 35(5) | -48(5) | -6(4)  | -8(4)  |
| O8  | 41(5) | 59(5)  | 50(5) | -20(4) | -23(4) | -11(4) |
| O9  | 40(5) | 126(8) | 18(4) | -31(4) | -8(4)  | -20(5) |
| S1  | 29(2) | 60(2)  | 27(1) | -17(1) | -12(1) | -3(1)  |
| S2  | 31(2) | 59(2)  | 28(1) | -23(1) | -17(1) | 6(1)   |
| S3  | 31(2) | 57(2)  | 22(1) | -20(1) | -13(1) | 0(1)   |
| Zn1 | 27(1) | 67(1)  | 22(1) | -23(1) | -12(1) | 0(1)   |
| Zn2 | 26(1) | 63(1)  | 23(1) | -22(1) | -12(1) | 0(1)   |
| Zn3 | 32(1) | 54(1)  | 30(1) | -19(1) | -16(1) | 0(1)   |
